# Supplementary material for: Molten salt assisted synthesis and electromagnetic wave absorption properties of (V1−x−yTixCry)2AlC solid solutions
Source: Royal Society of Chemistry journal article supplement (doi:10.1039/d1tc01338f), 2021-01-01
Supplement: d1tc01338f1.pdf [file d1tc01338f1.pdf]

## Supporting information

### **Molten salts assisted synthesis and electromagnetic wave absorption properties of $(V_{1-x-y}Ti_xCr_y)_2AlC$ solid solutions**

Wei Luo <sup>a</sup>, Yi Liu <sup>a, \*</sup>, Chuangye Wang <sup>a</sup>, Dan Zhao <sup>a</sup>, Xiaoyan Yuan <sup>a</sup>, Lei Wang <sup>a</sup>, Jianfeng Zhu <sup>a</sup>, Shouwu Guo <sup>a, b, \*</sup>

<sup>a</sup> *School of Material Science and Engineering, Shaanxi University of Science and Technology, Xi'an 710021, PR China*

<sup>b</sup> *Department of Electronic Engineering, School of Electronic Information and Electrical Engineering, Shanghai Jiao Tong university, shanghai 200240, PR China.*

*\* Corresponding Authors:*

Yi Liu, E-mail address: liuyi@sust.edu.cn

Shouwu Guo, E-mail address: swguo@sjtu.edu.cn

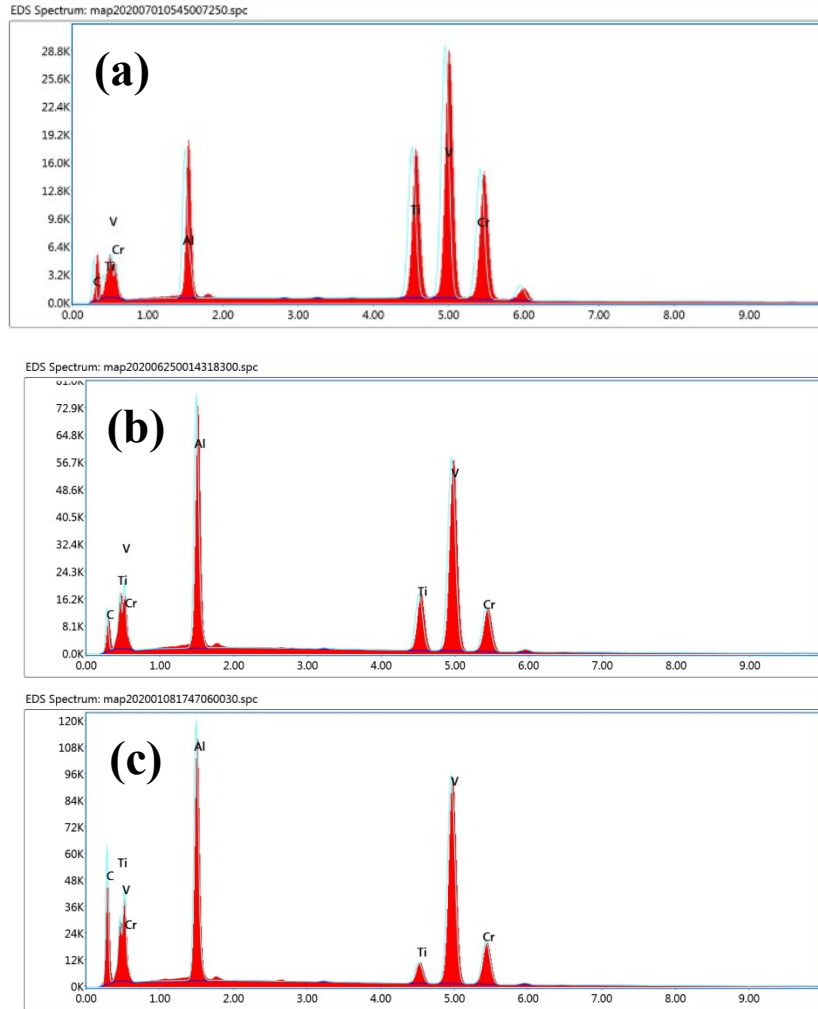

Fig. S1. EDX mapping results of the (a)  $(V_{1/3}Ti_{1/3}Cr_{1/3})_2AlC$ , (b)  $(V_{0.6}Ti_{0.2}Cr_{0.2})_2AlC$  and (c)  $(V_{0.8}Ti_{0.1}Cr_{0.1})_2AlC$ .

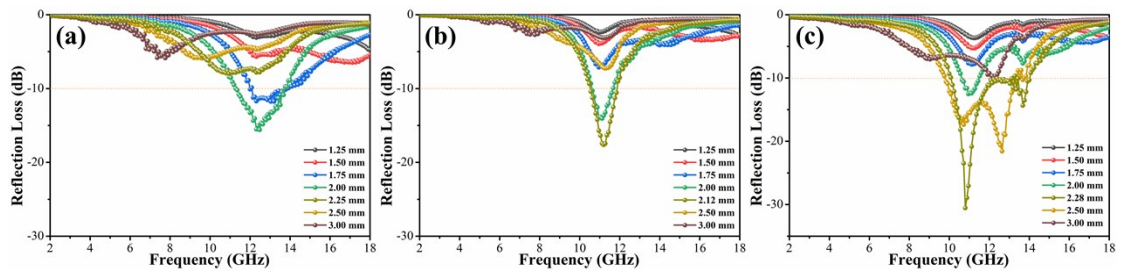

Fig. S2. Frequency dependence of calculated reflection loss curves for (a)  $V_2AlC$ , (b)  $Cr_2AlC$  and (c)  $Ti_2AlC$ .

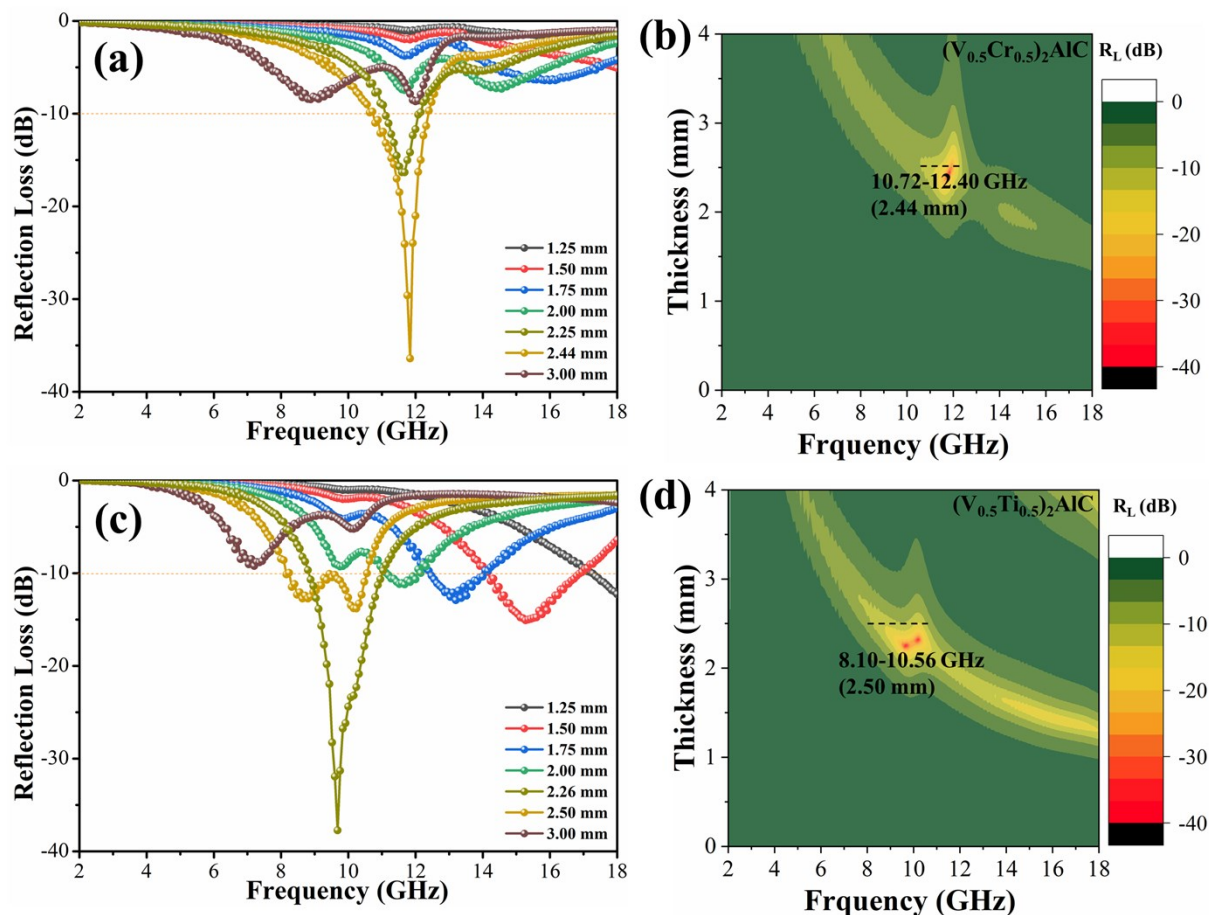

Fig. S3. Frequency dependence of calculated reflection loss curves and 2D color maps for  $(V_{0.5}Cr_{0.5})_2AIC$  (a-b) and  $(V_{0.5}Ti_{0.5})_2AIC$  (c-d).

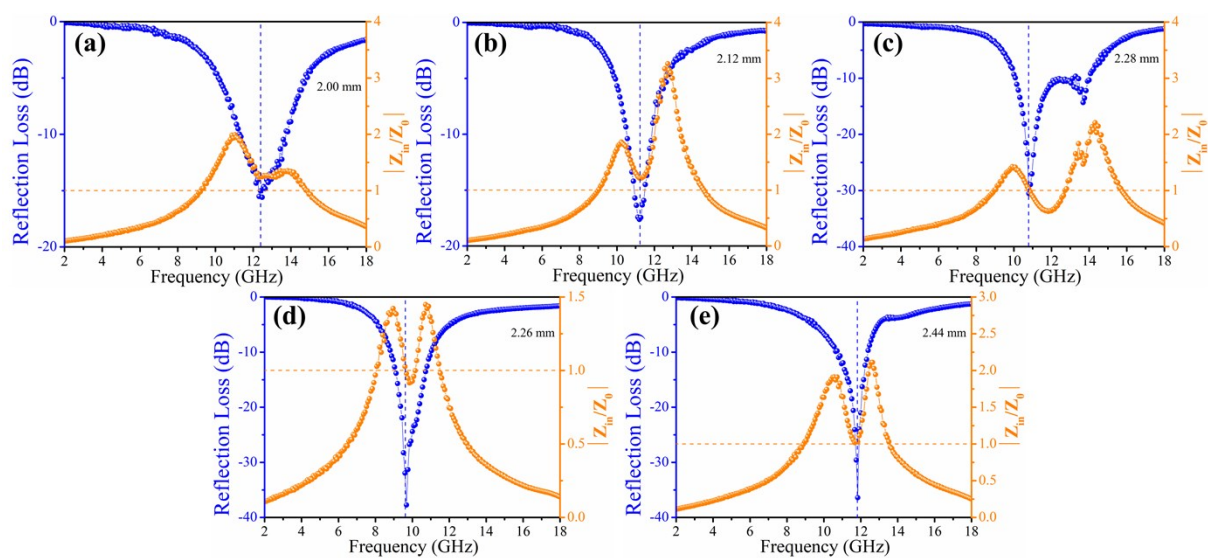

Fig. S4.  $|Z_{in}/Z_0|$  vs  $R_L$  value of as-prepared (a)  $V_2AIC$ , (b)  $Cr_2AIC$ , (c)  $Ti_2AIC$ , (d)  $(V_{0.5}Ti_{0.5})_2AIC$  and (e)  $(V_{0.5}Cr_{0.5})_2AIC$ .

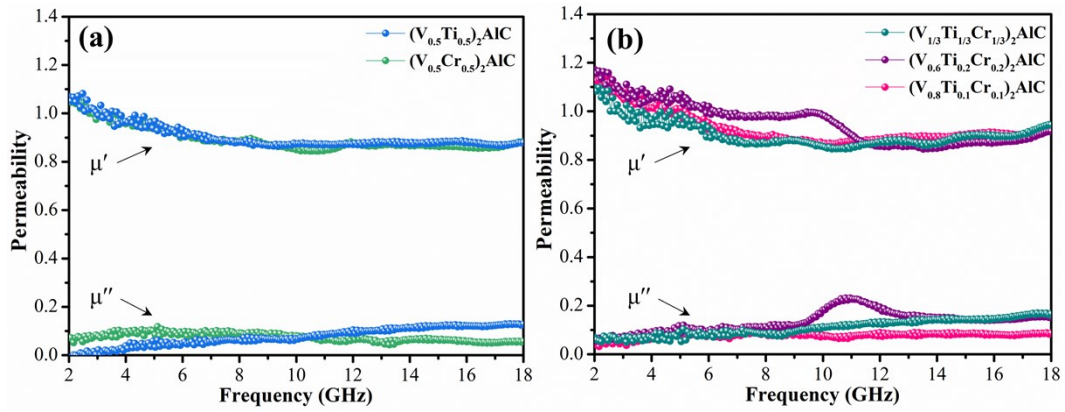

Fig. S5. The magnetic permeability of as-prepared  $(V_{1-x-y}Ti_xCr_y)_2AlC$  solid solution.

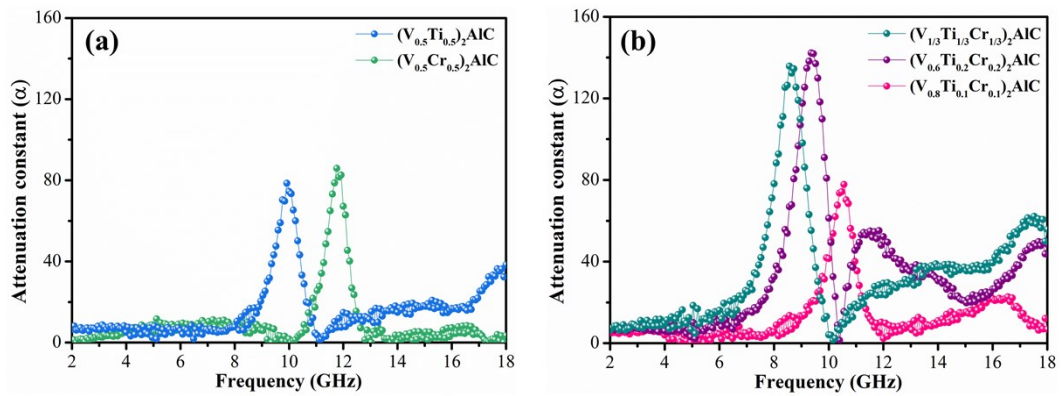

Fig. S6. The attenuation constant (a) of as-prepared  $(V_{1-x-y}Ti_xCr_y)_2AlC$  solid solution.

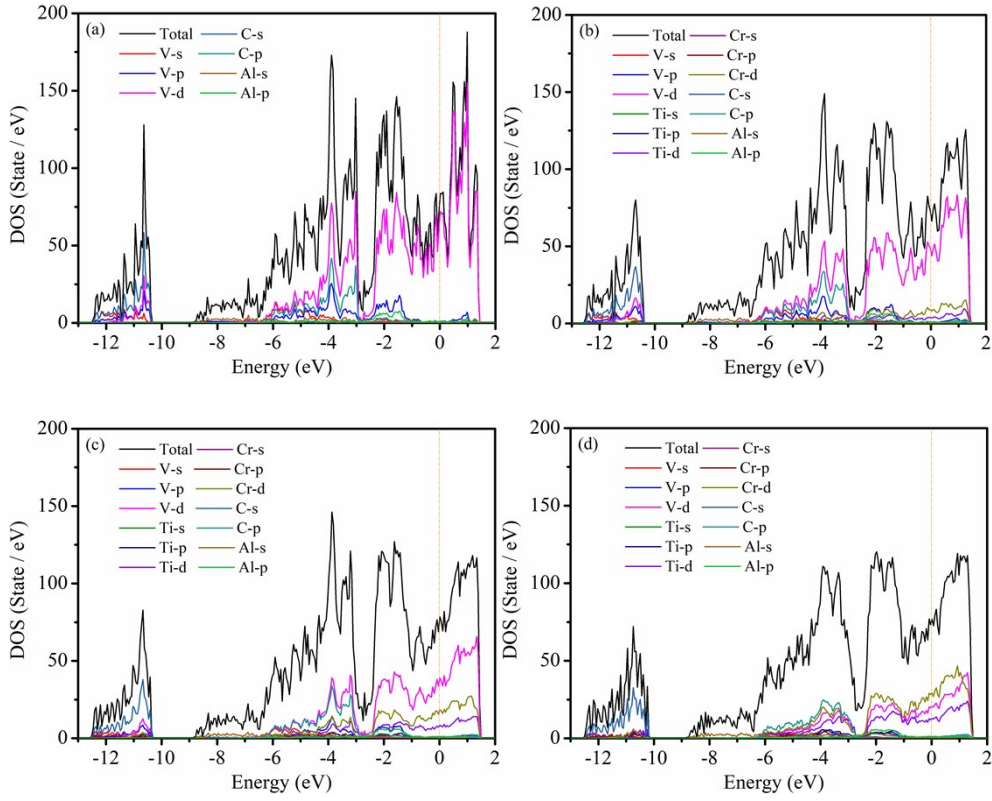

Fig. S7. (a-d) density of states for V based MAX phases. The vertical lines are used to refer Fermi level.

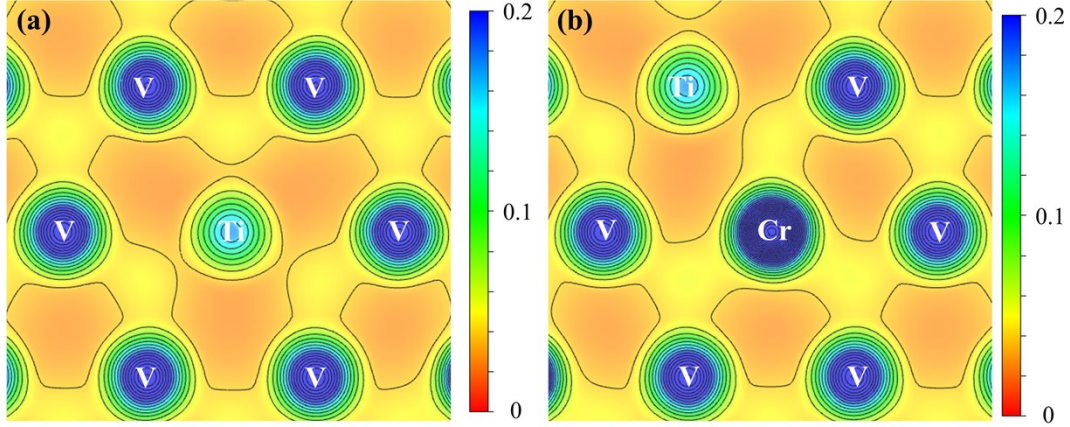

Fig. S8. Total charge density maps of M atomic layers in doped MAX phases: (a) low doping amount and (b) high doping amount.

**Table S1** The element concentration of obtained  $(V_{1-2x}Ti_xCr_x)_2AlC$  from SEM-EDX mappings.

| Stoichiometric ratio of V: Ti: Cr   | Theoretical |      |      | Experimental |      |      |
|-------------------------------------|-------------|------|------|--------------|------|------|
|                                     | V           | Ti   | Cr   | V            | Ti   | Cr   |
| $(V_{0.8}Ti_{0.1}Cr_{0.1})_2AlC$    | 0.8         | 0.1  | 0.1  | 0.77         | 0.10 | 0.13 |
| $(V_{0.6}Ti_{0.2}Cr_{0.2})_2AlC$    | 0.6         | 0.2  | 0.2  | 0.63         | 0.17 | 0.20 |
| $(V_{0.33}Ti_{0.33}Cr_{0.33})_2AlC$ | 0.33        | 0.33 | 0.33 | 0.43         | 0.30 | 0.27 |
